# Supplementary material for: Schistosoma mansoni Egg, Adult Male and Female Comparative Gene Expression Analysis and Identification of Novel Genes by RNA-Seq
Source: PLoS Negl Trop Dis. 2015 Dec 31;9(12):e0004334. doi: 10.1371/journal.pntd.0004334 (PMC4699917; doi:10.1371/journal.pntd.0004334)
Supplement: S1 Table — (XLSX) [file pntd.0004334.s001.xlsx]

## Sheet: S1 Table
S1 Table: List of primers used in real-time RT-PCR.
Gene description	Smp gene	Primer	Sequence
RNA Polymerase I	Smp_129500	PolI_Smp129500_F	GTGGGCACGTCTTACAATTT
		PolI_Smp129500_R	CGATACCAGGCACAGAGGAT
Tubulin	Smp_027920	Tubulin_Smp027920_F	CGGGACGCTAGTTTTTAACC
		Tubulin_Smp027920_R	TCCATGTTCGAGGCAGTAGA
DEAD box RNA helicase	Smp_013790	DDX_Smp_013790_F	GATGTCGCTTCTCGTGGTCT
		DDX_Smp_013790_R	GTCCGTCCTATGCGATGAAT
Nuclear receptor SmE78	Smp_000340	SmE78_Smp_000340_F	TTGCTCTTTGTTGTGCTGCT
		SmE78_Smp_000340_R	GCAGCTAAATGATGATCTTGGA
Glycolipid transfer protein	Smp_076390	GLTP_Smp_076390_F	TAACAAATTGATGCGTCGTG
		GLTP_Smp_076390_R	TCCTGTTCCAGTCCCAATTT
Translocase of Outer Membrase 70	Smp_010930	TOM70_Smp_010930_F	CCGGTGATATTAGCAAAGTGG
		TOM70_Smp_010930_R	AATCACCACGTTCAGACAGG
Eggshell protein	Smp_000430	EggShell_Smp_000430_F	GCCTACAGACAATCAGTACGGTAA
		EggShell_Smp_000430_R	GACGTTGGTTGGTAATTGGAA
Trematode eggshell protein	Smp_000390	TrEgg_Smp_000390_F	AAAGAAGCACGGAATGCAAC
		TrEgg_Smp_000390_R	CTTTCCACTGGTTTGCATCA
Eggshell protein	Smp_000430	EggShell_Smp_000430_F	GCCTACAGACAATCAGTACGGTAA
		EggShell_Smp_000430_R	GACGTTGGTTGGTAATTGGAA
Trematode eggshell protein	Smp_000390	TrEgg_Smp_000390_F	AAAGAAGCACGGAATGCAAC
		TrEgg_Smp_000390_R	CTTTCCACTGGTTTGCATCA
Tyrosinase 1	Smp_050270	TYR1_Smp_050270_F	TACAGGGACAGCAAGCAATG
		TYR1_Smp_050270_R	CGGGATATGCGTTTGGACTA
Tyrosinase 2	Smp_013540	TYR2_Smp_013540_F	ACAGCATTCCCAACAACTCA
		TYR2_Smp_013540_R	GCTTGATGAAAACCACGACA
ATP-binding cassete transporter	Smp_040540	ABCATPase_Smp_040540_F	GCCATGACTTTAGGCTCATATC
		ABCATPase_Smp_040540_R	AACGCTTCGCATCAAATGTT
p14	Smp_131110.4	p14_Smp_131110.4_F	TGGTAGCGGTAAGGGTAAGG
		p14_Smp_131110.4_R	ACCATAATCACCGCCATAGG
Serotonin Receptor	Smp_126730	5HTR_Smp_126730_F	AAGTGCAGCTGGTTACAACACT
		5HTR_Smp_126730_R	TGGATTGAGAAAACTGTTCACG
WNT5	Smp_145140	WNT5_Smp_145140_F	CAGCATTTGGTCCGGTAACT
		WNT5_Smp_145140_R	CGAGCTTCTTTACAACTTCTTGC
Scavenger receptor CD36	Smp_011680	CD36_Smp_011680_F	ACGTCGGGAAAGTGCTAAGA
		CD36_Smp_011680_R	CATTTGTAGTCCTGGCCGTA
Na/K ATPase	Smp_124240	NaKATP_Smp_124240_F	GCTAGAACTGGGGCTCAAAG
		NaKATP_Smp_124240_F	CTGTGCATCGTCAGCAGAAT
Calcium Binding Protein	Smp_005350	CaBP_Smp_005350_F	AACGTGGAGAAATTGATGTCG
		CaBP_Smp_005350_R	CCTGACCCATCGGTATCAGTA
Discoidin Domain Receptor	Smp_133250	Discoidin_Smp_133250_F	TGTCGAAACCATCATCATCTG
		Discoidin_Smp_133250_R	TGGTGGCTTCTCAATGTCAA
Plasminogen Activator Inhibitor	Smp_009310	PAI1_Smp_009310_R	TAGCTCCGACAGAAGCACCT
		PAI1_Smp_009310_F	ACGACCTCGACCAAACATTC
Vitamin K epoxide reductase	c8208_g1_i2	VKOR_F	AATAGCGTTTTCGCACGTTT
		VKOR_R	AGTTTCGATGTTTCGGCAAA
BolA-like	c6943_g1_i1	BolA_F	TGCCGGTCCAGTAGAATCTC
		BolA_R	CTGGTTATGACGATGACTTTCG
Reticulon	c1704_g1_i1	Reticulon_F	GGTCTTTAATCAAGCTGCAACA
		Reticulon_R	TCGAAGACGTCCTGTGTTCTT
Meiosis expressed gene	c15393_g1_i1	MEIG_F	CAACGTGCATCTCATTGGTC
		MEIG_R	CCATTTCTCTGGGTCAGCAT
Lifeguard	c17331_g1_i1	SmDLFG_F	TTGGAGATGGGTCTCGTACC
		SmDLFG_R	AGCTGGGATCGAGAGAATCA
Glyceraldehyde-3-phosphate dehydrogenase	Smp_056970	GAPDH_Smp_056970_F	TGGAGTCTTTACGACCATTGA
		GAPDH_Smp_056970_R	ACAACGAACATGGGTGCAT
Transmembrane 9 superfamily member	Smp_162040	TM9SF_Smp_162040_F	TGCAACCATTCTTCTGCGTA
		TM9SF_Smp_162040_R	TTCCAACCAGATTCCTCCTG
14-3-3 protein	Smp_009780	14-3-3_Smp_009780_F	CGCCTTCGATTCAGCAATAG
		14-3-3_Smp_009780_R	GTTTGGTCACTGGCCCATA
RAC GTPase	Smp_062300	RAC_Smp_062300_F	CGAAAACCTGTGAACCTTGG
		RAC_Smp_062300_R	GGGAAAAGCACATCAAAAACA
Ribosomal Protein S2	Smp_013470	RPS2_Smp_013470_F	TTCAAATGGCTGGTATCGAA
		RPS2_Smp_013470_R	TCGTATGGCTGCGTATGTTG
SMYB	Smp_097800	SMYB_Smp_097800_F	ACAAAGGTGACGAAGCATCC
		SMYB_Smp_097800_R	CCCACGCATGTTAAATACCC
Granulin	Smp_170550	Granulin_Smp_170550_F	CGTTCTTCTAATGGGGCTGT
		Granulin_Smp_170550_R	TAAGCACCACATCCAAAGCA
Sm14 - 14 kDa fatty acid-binding protein	Smp_095360	Sm14_Smp_095360_F	GTTCGTGAAGTGGATGGTGA
		Sm14_Smp_095360_R	TCATTTGGAGGCGTTAGGAT
